# Supplementary material for: Intrathecal Synthesis Index of Specific Anti-Treponema IgG: a New Tool for the Diagnosis of Neurosyphilis
Source: PubMed Central journal article supplement (PMC8826818; doi:10.1128/spectrum.01477-21), 2022-02-09
Supplement: spectrum01477-21_supp_1_seq4.pdf [file spectrum01477-21_supp_1_seq4.pdf]

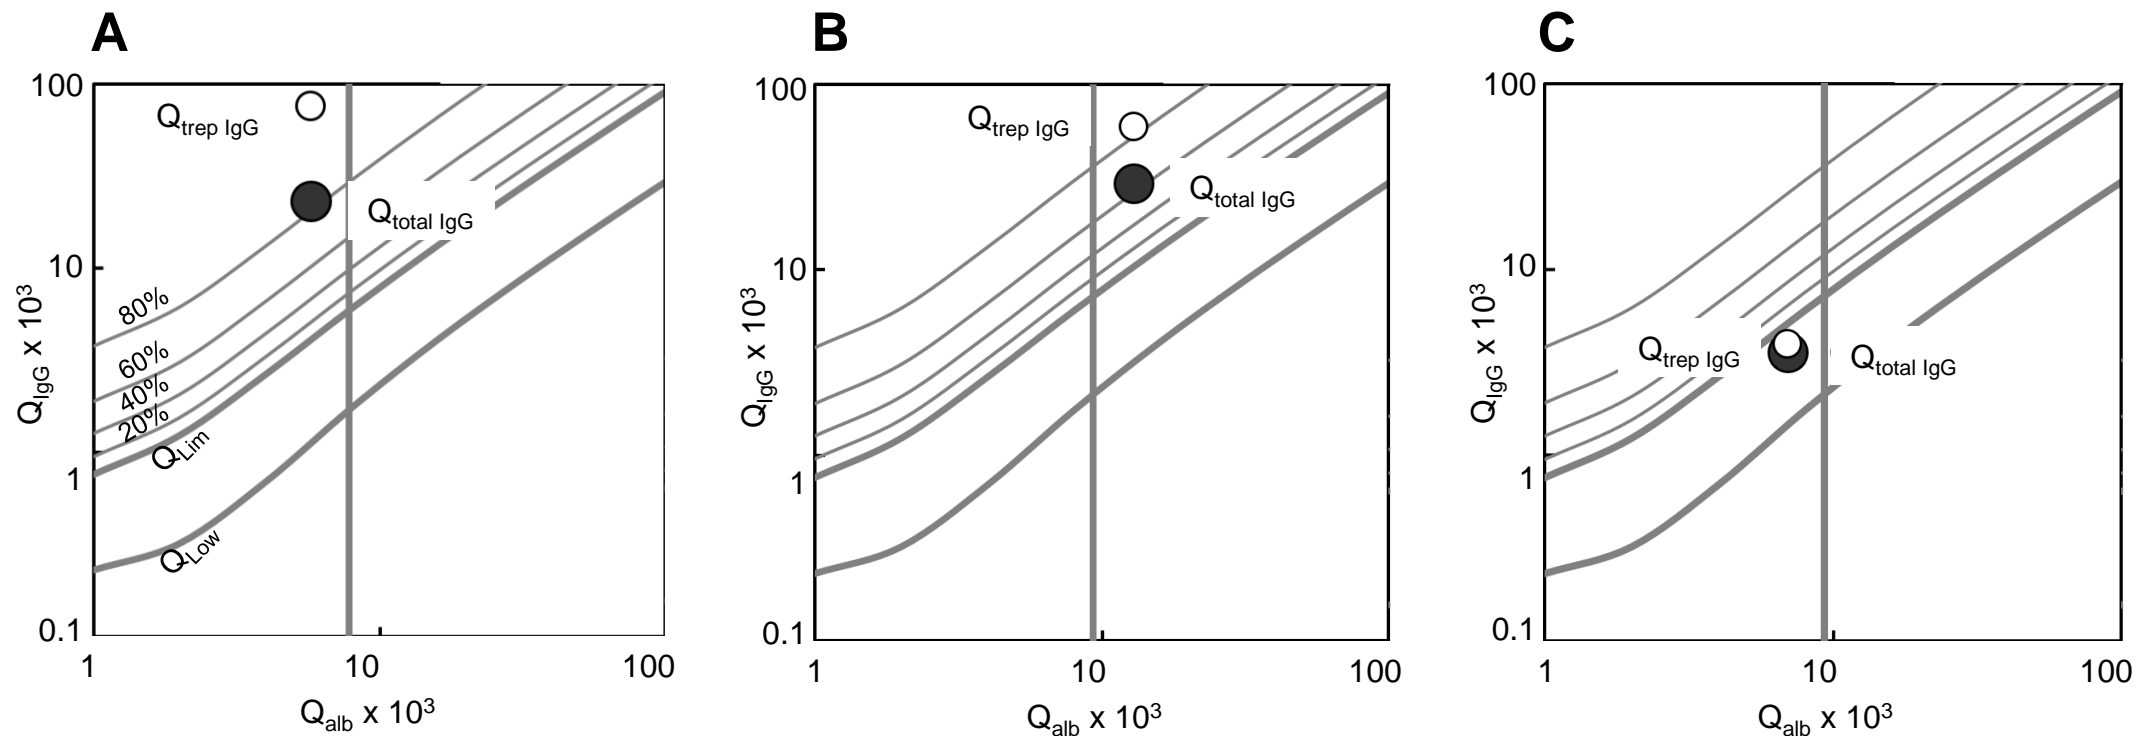

Supplementary figure1. Reiber diagram showing  $Q_{\text{trep IgG}}$  (white circle) and  $Q_{\text{total IgG}}$  (black circle) from NS1 (A, B) and NS2 (C) patients with (B) or without Blood Brain Barrier disruption (A,C).

The thick hyperbolic lines represent  $Q_{\text{Low}}(\text{IgG})$  and  $Q_{\text{Lim}}(\text{IgG})$  calculated according to  $Q_{\text{Lim}} \text{IgG} = 0.93 \times \sqrt{(Q_{\text{alb}}^2 + 6 \times 10^{-6})} - 1.7 \times 10^{-3}$  and thin hyperbolic lines represent IgG fraction produced in CSF. The vertical line represents the **limits** of the albumin-quotient calculated for age >4 years according to  $Q_{\text{Lim}} \text{Alb} = (4 + \text{age}/15) \times 10^{-3}$
